# Supplementary material
Source: PubMed Central journal article supplement (PMC4063813)
Supplement: viru-5-521-s01.pdf [file viru-5-521-s01.pdf]

## **Supplemental Material to:**

**Anandkumar Malde, Dharanesh Gangaiah,  
Kshipra Chandrashekhar, Ruby Pina-Mimbela,  
Jordi B Torrelles, and Gireesh Rajashekara<sup>1</sup>**

**Functional characterization of exopolyphosphatase/  
guanosine pentaphosphate phosphohydrolase (PPX/  
GPPA) of *Campylobacter jejuni***

**Virulence 2014; 5 (4)**

**<http://dx.doi.org/10.4161/viru.28311>**

**<http://www.landesbioscience.com/journals/virulence/article/28311/>**

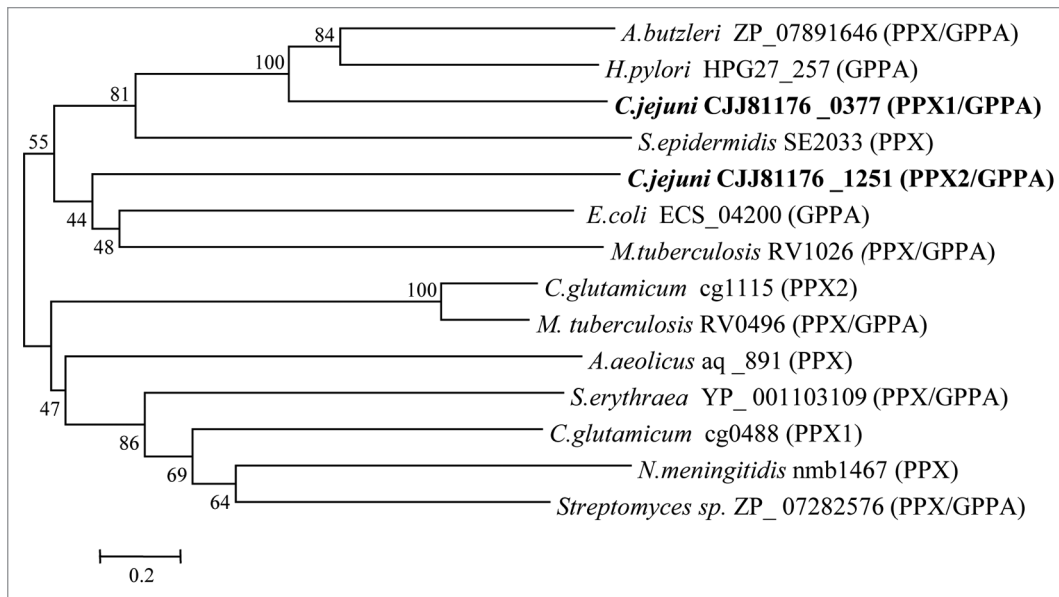

**Figure S1.** Phylogenetic tree of *C. jejuni* PPX/GPPA enzymes. MEGA-5 software was used to construct the phylogenetic tree. Branch lengths are indicated next to the protein name and are proportional to the predicted evolutionary change. The number at the branch node indicates the cophenetic correlation coefficient.

**Figure S2A (See next page).** Structure-based sequence alignment of PPX/GPPA proteins. (A) Alignment of PPX/GPPA domains of *C. jejuni* and related bacteria. Sequence alignment was performed using ClustalW2 (<http://www.ebi.ac.uk/Tools/clustalw2/index.html>). \* indicates positions which have a single, fully conserved residue; ▲, the residues strongly conserved; ■, the residues weakly conserved. Catalytic residue required for phosphatase activity is highlighted in bold letters in red color and the residues required for guanosine pentaphosphate specificity are highlighted by bold black letters on yellow and green background. The conserved amino acids sequence highlighted in sky blue indicates the Walker B motif. *C. jejuni* CJJ81176\_0377-(PPX1/GPPA); *A. butzleri* JV22 ZP\_07891646-(PPX/GPPA); *H. pylori* HPG27\_257-(GPPA); *E. coli* ECS88\_4200-(GPPA); *N. meningitidis* MC58 nmb1467-NP\_274476.1 (PPX); *Streptomyces* spp. AA4 ZP\_07282576-(PPX/GPPA); *S. erythraea* NRRL2338 YP\_001103109-(PPX/GPPA); *M. tuberculosis* RV1026-NP\_215542.1(PPX/GPPA); *C. glutamicum* ATCC 13032 cg1115-(PPX2); *C. glutamicum* cg0488-(PPX1); *M. tuberculosis* RV0496- NP\_215010.2 (PPX/GPPA); *A. aeolicus* aq\_891-(PPX); *S. epidermidis* SE2033-(PPX); *C. jejuni* CJJ81176\_1251-(PPX2/GPPA). For (B and C), see following page.

A

CJJ81176\_0377 2577-MAKKTAVDVLGNSIRRMVIFEKTSRYG-----FYTTCEYKRRKVRNLGEN 43  
 ZP\_07891646 -----MSKVTTIIDIGSNSMRMVVLQKSSRFA-----FSLINETKSRVKISEG 43  
 HPG27\_257 -----MAKITTVIDIGSNSVRLAVFKKTSQFG-----FYLLFETKSKSVRISEG 43  
 EC888\_4200 ---MGSTSSLYAAIDIGSNSFHMVLVREAVGS-----IQLTTRIKRKRVLAAAG 45  
 NP\_274476.1 --MTTTPANVLASVDLGNSFRLLQICENNNQ-----LKVIDSFKQMVRFAG 46  
 ZP\_07282576 -----MPRVAAIDCGTNSIRLLVAELTPR-----HDGTVDLRLHREMIRIVRLGQG 46  
 YP\_001103109 -----MSRVAADICGTNSIRLLVADVTPSPGPDSDPDGGTRHLRDLHREMIRIVRLGQG 53  
 NP\_215542.1 -----MALTRVAAIDCGTNSIRLLIADVAG-----LARGELHDVHRETRIVRLGQG 47  
 cg1115 -----MTRYAAIDCGTNSIRLLITEVTPG-----FKEITRENTIVRLGQG 41  
 cg0488 -----MRLGVLDVGSNTVHLVAVDARPGG-----HPTMSNWRTPLRLVEL 41  
 NP\_215010.2 -----MRLGVLDVGSNTVHLLVVDARHGG-----HPTMSSTKATLRLAEA 41  
 aq\_891 MSLDNKPIMRVASIDIGSYSVRLTIAQIKDGK-----LSIILERGRITSLGK 48  
 SE2033 -----MEERIGLIDIGSNTIRLVIFGYNKKTG-----LNEILNIKTPLARLQY 43  
 CJJ81176\_1251 -----MLGIDLGSNTRLRAVQMDKLNK-----LKEYEFVIGAAKN 35

▲\* ▲▲ ▲▲

CJJ81176\_0377 2577-AYNNGKILQEEAMQRAEDALAFFKQCALKKHCKKIFIVGTSALRDAPNSKNFIKRIKNDL 103  
 ZP\_07891646 CYENDGNLQEI PMQRAYESLKSFLNLSNALKSRKII CVATSA LRDPAPNSKTFINKVBNDL 103  
 HPG27\_257 CYAFNGILQEI PMQRAVKLSEFEKIALKYKSKKILCVATSAVRDAPNRLFEVAVKKA 103  
 EC888\_4200 LNS-ENALSNEAMERGQWQCLRLFAERLQDIPPSQIRVVATATLRLAVNAGDFIAKAQEL 104  
 NP\_274476.1 LDE-QKNLSAASQEQALDCLAKFGERLGRPEQVRAVATNTFRVAKNIADFLPKAEAL 105  
 ZP\_07282576 VDA-TGRLAPEALERTRAAALADYTVAAARRKGVKEKVMVATSA TRDASNRDEFFAMTRET 105  
 YP\_001103109 VDA-TGRLADEALERTRAAALVDYANIAARRKGVIRMVATSA TRDASNREEFFAMTRET 112  
 NP\_215542.1 VDA-TGRFAPEAIARTRTALT DYAEELLTFHHAERVVMVATSAARDV VNRDVFVAMTADVL 106  
 cg1115 VDA-TGQLDSEKAIERTVALENYVELMETHGVEAVRMVATSA TRDASNRDEFFSMTRQLL 100  
 cg0488 LDD-SGAISEKINKLSAVGEAADLAKTLGCAELMPFATSAVRSA SEAVLDHVEKT 100  
 NP\_215010.2 TDS-SGKITKRGADKLSTIDEFAKIAISSGCAELMAFATSAVRDAENSEDVL SRVRKET 100  
 aq\_891 VKE-TGRLQEDRIEETIQVLKEYKKLIDEFKVERVKAVATEAIRRAKNAEFLERVKREV 107  
 SE2033 LTK-SNEMNDEGIHVLKETLSSFRKVADKFNVDALYPIATAAIRQSKNREAIKEIKQDI 102  
 CJJ81176\_1251 LNQ-SGEISKEAIQRLKNA LSLAKEQD---LSKARAVATAAFRKASNTNEIFAHLKEEF 91

▲ ▲▲ ▲▲ ▲▲

CJJ81176\_0377 2577-S-----LNIRCIDGKSESYLGGLAALNLLSP--FKDGTI-LDIGGGSSLECLIKN----N 151  
 ZP\_07891646 G-----LNKIVIDGKEKAYFGGVAASNLLH--DDTFVT-VDIGGGSTEFCEVKN----G 150  
 HPG27\_257 G-----LQIKVIDGQKEKALYGGIACANLLH--KNSGIT-IDIGGGSTECALIEK----G 150  
 EC888\_4200 G-----CPVQIVISGEEKARLIYQGVHTTG--GADQLVVDIGGGSTELVTGTG----A 152  
 NP\_274476.1 G-----FPIEIIAGREEARLIYTGVIHTLPP--GGGKMLVIDIGGGSTEFVIGST----L 154  
 ZP\_07282576 G-----VEAEVVISGDEEARLSFTGAVGQDP--DDGPFVVVDVGGGSTELVLVTGWNREA 158  
 YP\_001103109 G-----IDAENVITGDEEARLSFIGAVGLDLP--QDGFVVVDVGGGSTELVLVGTWDGVR 165  
 NP\_215542.1 GAALPGSAAEVIITGAEEARLSFRGAVGELGS--AGAPFVVVDLGGGSTEIVLG----EH 159  
 cg1115 SKIRPGYQAEVVISGEEARLSFRGAIVDLPE--DQGPFCVIDLGGGSTEFIVGTY----DG 155  
 cg0488 G-----VRLSILSGDEARQTFILAVRWYGP--SAGRITNLDIGGSSLELSGGTD----E 149  
 NP\_215010.2 G-----VELQALRGDEARSLTFLAVRWYGP--SAGRITNLDIGGSSLEVSSGVD----E 149  
 aq\_891 G-----LVVEVITPEQEGRYAYLAVAYSLK--PEGEVCVVDQGGGSTEIVFGK----Y 155  
 SE2033 H-----IEIQIVPEEDBAFYGYVAITHTTDI--ENG--ISVDIGGGSTEIVTLFKD----K 149  
 CJJ81176\_1251 G-----IDFKLIDAKSEAKISVYLMQSGLRRLKIWGEFAYC-DLGGASCELSFGKS---- 141

▲ ▲▲ ▲▲ ▲▲

CJJ81176\_0377 2577-RIISCISLDIGTIVRLKELFYDTG-----KMDSLEEFIKPILEQIPKEFCN----QNLIA 201  
 ZP\_07891646 KIEKSISLNIGTVRIKELYFNKN-----NIEGAKKYILDNLKIFKLDVEIP--KKVVG 202  
 HPG27\_257 KIKDLISLDVGTIRIKEMFLDKDL-----DVKLAKAFIQEVSLPKFKHKN-----AFG 199  
 EC888\_4200 QTTSLFSLMSGCVTWLERYFADRNL-QQENFDAEKAQEVLRPFVADRLYHG-WKVCV 210  
 NP\_274476.1 NPDITESLPLGCVTYSLRFFQN-KI-TAKDFQSAISAAARNEIQRISKNMRRREG-WDFAVG 211  
 ZP\_07282576 EVTAAKSVDIGCVRITERALKDDPP-TADEIAAARELARGILAEAFVVDVAVK-ARTWIG 216  
 YP\_001103109 DITAAYSADIGCVRLTERSLHGDPP-AEDEVREAVKVARGILDFAFVDDSSD-ARTWVG 223  
 NP\_215542.1 EVVAYSADIGCVRLTERCLHSDPP-TLQEVSTARLVRERLEPALRTVPLEL-ARTWVG 217  
 cg1115 EILGSHSTQMGCVRLTRIMRSDPP-TETEVEIARDYVAERIQEVKAIVPIK-AKTFVG 213  
 cg0488 SPDLAFLDLGAGRLTHNWFDTPPP-ARKKINLLRDYIDAEALAEAPQMRTLGPAPLAV 208  
 NP\_215010.2 EPEIALSLPLGAGRLTREWLPDDPP-GRRRVAMLRDWDLAELAEPSVTULEAGSPDLAVA 208  
 aq\_891 KVREVISLPIGIVNLTTFFKQDPP-TEEEVKRFFELEKELSKVKKPVDT-----IVG 208  
 SE2033 QLKEAHSFPFGVVS LKRFQFGDKAHNDKTAIKNMEQFLREQFSQLDWLSNQHI----ALVG 206  
 CJJ81176\_1251 ----FKSDFGIIISFYEKNCNHSYYSKCSISYKKLIKYPKFIINIKKKLKHIFLIANPYL 197

\* ▲▲ ▲▲

CJJ81176\_0377 2577-IGGSRLAISNSIMQKNSYPLKNLHDFRYMLDEEKGHILKIFNS-NLDSLINFGIKKDE-F 259  
 ZP\_07891646 IGGSRALSKLIMVKNQYPLDILHGYTYEVKNEIALNLRISKSKNCEDLKSFGIKKDR-F 261  
 HPG27\_257 VGGTIRALSKVLMKRFPYDIDSLHGVEYDAHNKLAFLIEKIVML-KEDQALLGVNEER-L 257  
 EC888\_4200 ASGTVALQEIIMTAQG-----MDERITLEKLQQLQRAIHGRLEBLEIDGLTLEA-A 262  
 NP\_274476.1 TSGSAKSIRDVLAAEMP-----QEADITYKGMRALAERIIIEAGSVKKAKFENLKPFR-I 264  
 ZP\_07282576 VAGTVITLSAVSLGLPEYDSERVHLSKLTGQIDELAQQLLASDRATRAENPVIPHGR-V 275  
 YP\_001103109 VAGTVITLSAIAQNLPYDPAAIHLSQISRNGLERTTEQLLSMTHDERAGISLHAGR-V 282  
 NP\_215542.1 LAGTMTTLSALQASMTAYDAAAIHLSRVPGADLLEVCQRLIGMTRKQRAALAPMHPGR-A 276  
 cg1115 CAGTFTTISAWVQGLSEYDRDAIHLSALNFDALRVVDEIIISSESSQASRANPVVDPCR-A 272  
 cg0488 TSKTFTTILARLTGAAPSSAG-PHVTRTLTAPGLRLQIAFISRMATAADRAELEGISSDR-S 266  
 NP\_215010.2 TSKTFTSLARLTGAAPSMAG-PRVKRTLTAAGLRQLIAFISRMATAADRAELEGVSADR-A 266  
 aq\_891 LGGTIITTLAALYINVVPYDPQKVHGVKLTGYQIKHWFTDFKEIPSEERSKFRQVEDRA 268  
 SE2033 VGGSAARNVARIHQSAHAYPIGGVHNYKMTSKDINNVDLRKSSRDELTLNLDGLSRD-V 263  
 CJJ81176\_1251 KHLAFARFDEVAITIKKELHSLGVKTVVLN-SGVTITLSALKONISYEKVEYTRVNGKKLC 259

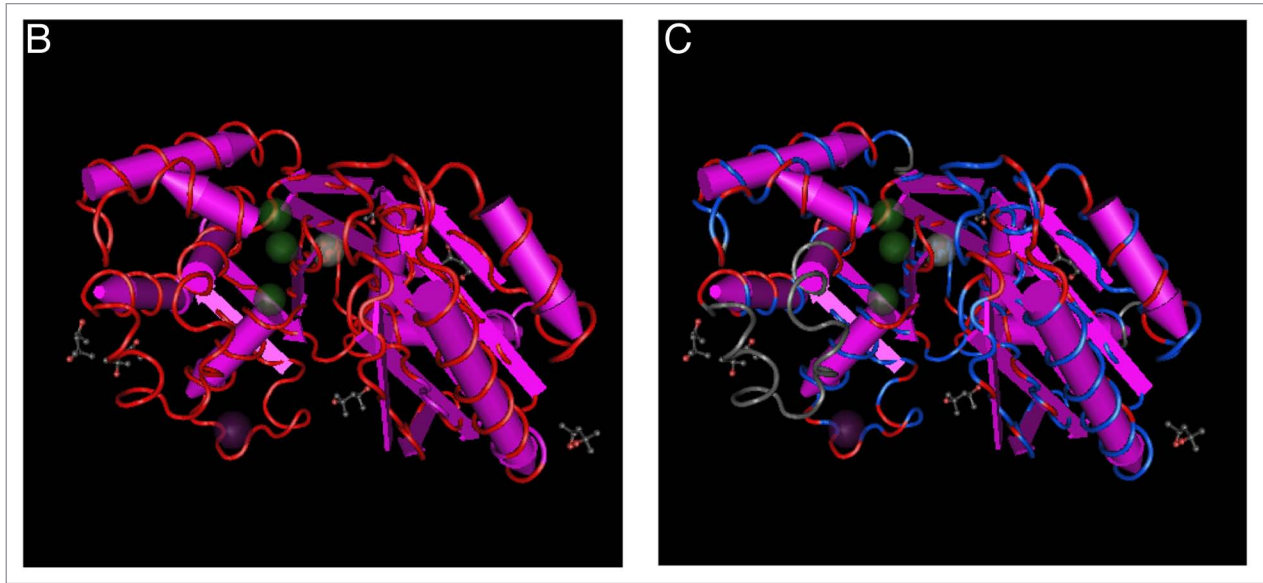

**Figure S2B and C.** Structure-based sequence alignment of PPX/GPPA proteins. **(B and C)** Predicted 3D structure of *C. jejuni* PPX/GPPA proteins. 3D structure was identified with CBLAST, 3D structure alignment search tool using *A. aeolicus* PPX/GPPA as reference (<http://www.ncbi.nlm.nih.gov/Structure/CBLAST>). **(B)** 3D structural alignment of *C. jejuni* PPX1/GPPA. **(C)** 3D structural alignment of *C. jejuni* PPX2/GPPA. The region in pink or red indicates *C. jejuni* PPX/GPPA residues identical to *A. aeolicus* PPX/GPPA, while the region with no homology is indicated in blue. The region in grey indicates unaligned sequences of *C. jejuni* PPX/GPPA. For **(A)**, see previous page.

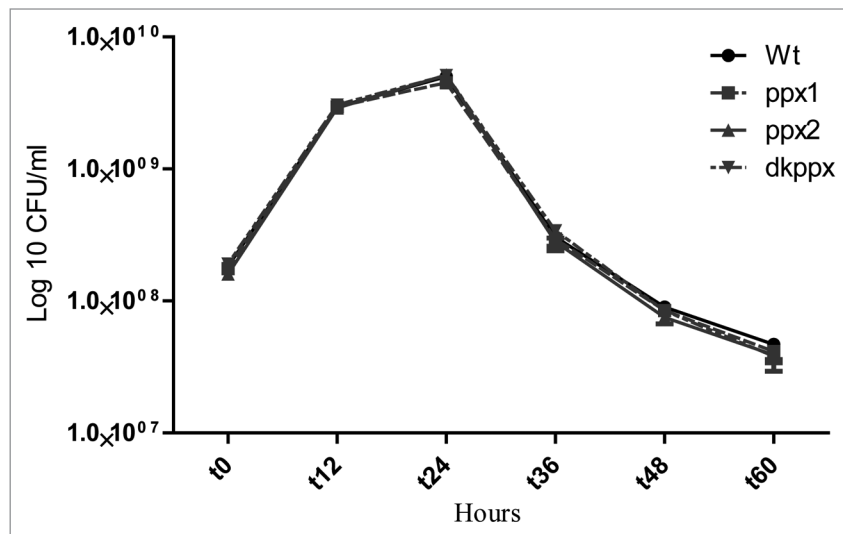

**Figure S3.** Growth kinetics of *C. jejuni*  $\Delta$ ppx mutants. Mid-log phase grown cultures were used to adjust an  $OD_{600}$  of 0.05 in 5 ml of MH broth and incubated microaerobically at 42 °C with shaking at 200 rpm. The growth was assessed by CFU determination at different time points.

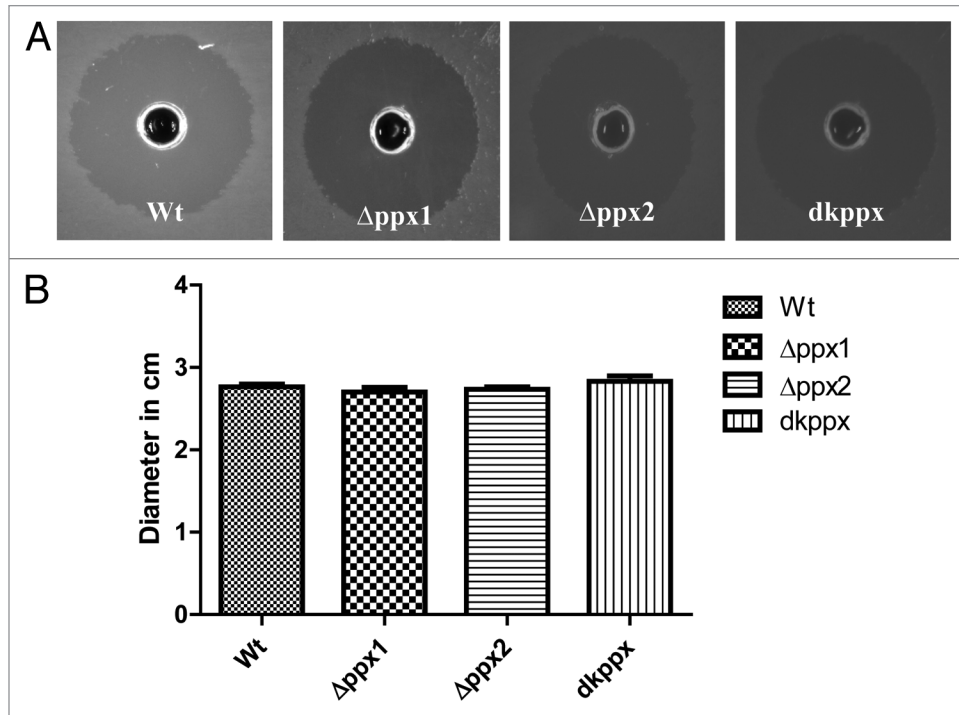

**Figure S4.** Sensitivity of  $\Delta$ ppx mutants to oxidative stress. **(A)** Sensitivity to oxidative stress was determined by disc diffusion assay using 0.3% hydrogen peroxide or 20 mM paraquat. **(B)** Quantification of oxidative stress, the zone of inhibition was measured after 24 h of incubation and expressed in centimeter. Each bar represents the mean  $\pm$  SE from 3 independent experiments performed in triplicate each time.

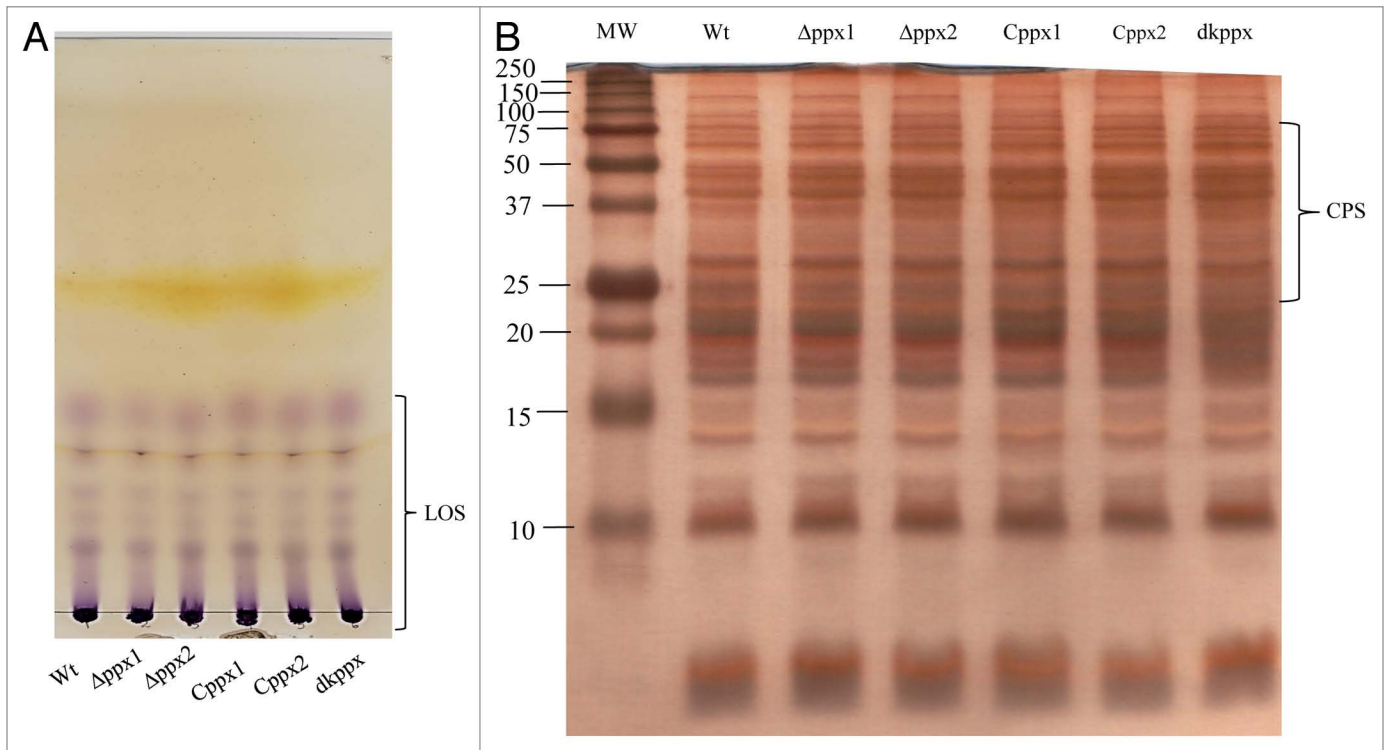

**Figure S5.** LOS profile of  $\Delta$ ppx/gppa mutants. **(A)** Whole cell lysate (50  $\mu$ g protein) was spotted on TLC plate and developed with n-propanol-water-25%  $\text{NH}_4\text{OH}$  (60:30:10-v/v/v) solvent system and visualized by using 10% sulfuric acid in ethanol. **(B)** CPS whole cell lysates (20  $\mu$ g protein) were separated by 15% SDS-PAGE and stained with periodic acid silver nitrate (PAS) stain.

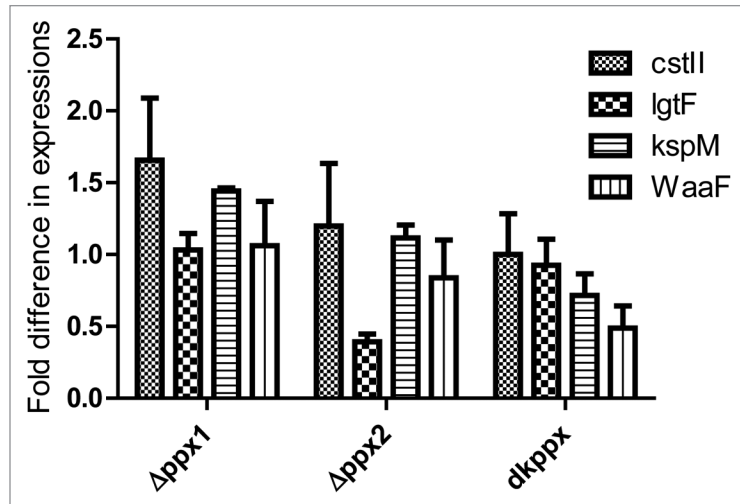

**Figure S6.** qRT-PCR analysis of *C. jejuni*  $\Delta ppx$  mutants for genes involved in LOS and CPS biosynthesis. Fold difference in transcript level was assessed by  $\Delta\Delta CT$  method after normalizing the expression to 16s-rRNA and compared to wild-type expression level. Each bar represents the mean  $\pm$  SE of the relative fold change in expression from 4 independent experiments performed in duplicates each time. \* $P \leq 0.05$ .

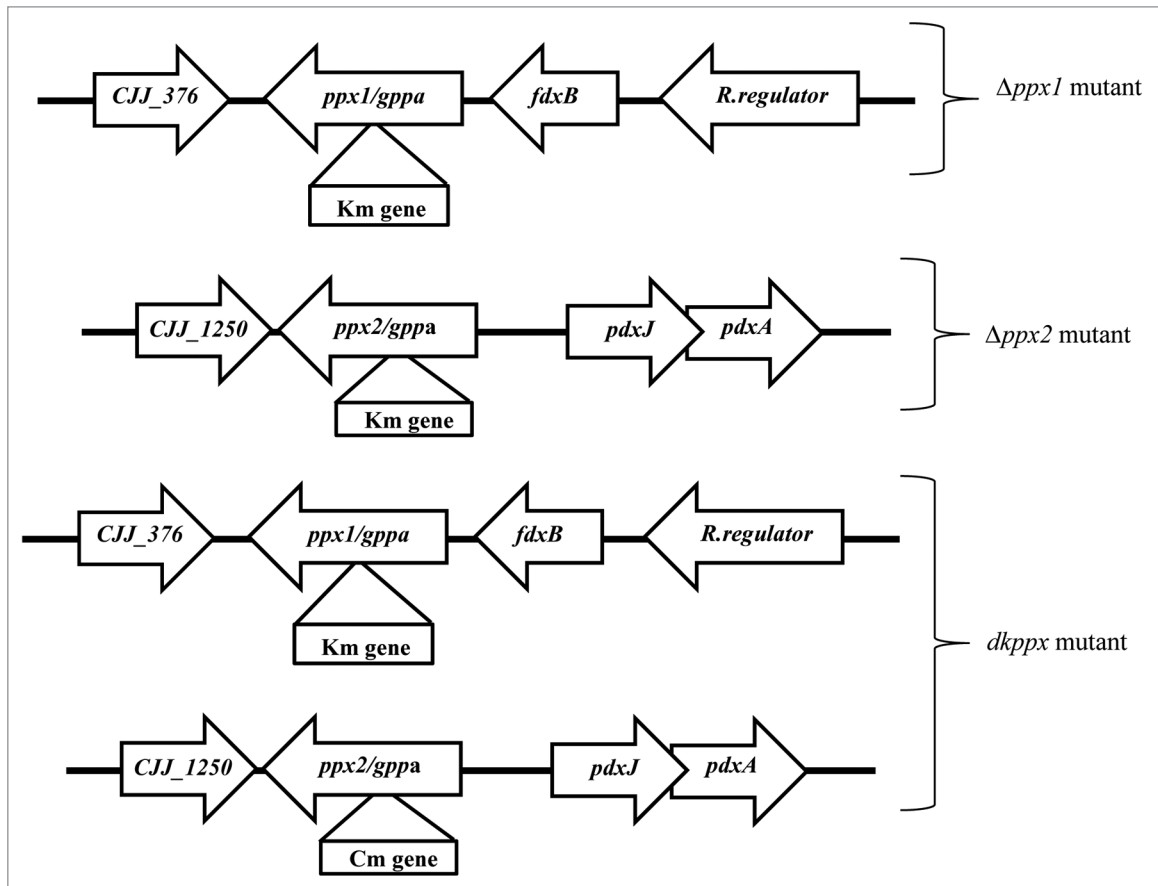

**Figure S7.** Genetic organization of *ppx1/gppa* and *ppx2/gppa* genes in *C. jejuni* genome. Schematic representation (not drawn to scale) of approximate location of kanamycin, and chloramphenicol antibiotic markers in  $\Delta ppx$  deletion mutants of *C. jejuni* 81-176 strain. The *fdxB* encodes ferredoxin, *pdxJ* encodes for pyridoxine 5'-phosphate synthase, and the *pdxA* encodes 4-hydroxythreonine-4-phosphate dehydrogenase.

**Table S1.** List of primers used in this study.

| Name                       | Sequence (5'-3')                                                                            | Description                                                                              |
|----------------------------|---------------------------------------------------------------------------------------------|------------------------------------------------------------------------------------------|
| PPX1/GPPA_F<br>PPX1/GPPA_R | AAATTAG <b>GTA</b> CCATATGAGT GTAGCGGAGC TT<br>AAATTACT <b>GTC</b> AGGGTTATCA AACCGATTCT TC | Used for <i>ppx1/gppa</i> gene amplification along with 1 kb up and downstream sequences |
| PPX1/INV_F<br>PPX1/INV_R   | TTAATT <b>GGAT</b> CCTCTCTATG TTTGAGTTTT AA<br>AATTAAG <b>GAT</b> CCCTCTATAA GATTTTGAAT TC  | Used for <i>ppx1/gppa</i> gene deletion by inverse PCR                                   |
| PPX1C_F<br>PPX1C_R         | TTAATT <b>GGAT</b> CCTCTCTATG TTTGAGTTTT AA<br>GATAT <b>GGATC</b> CGAAGCTATT TATGAAAATA G   | Used for <i>ppx1/gppa</i> gene amplification for complementation                         |
| PPX2/GPPA_F<br>PPX2/GPPA_R | AAATTAG <b>GTA</b> CCAAACAAGT TGATCCTTTG GA<br>AAATTACT <b>GTC</b> AGGTAAGCTT TCGTGGATAA AA | Used for <i>ppx2/gppa</i> gene amplification along with 1 kb up and downstream sequences |
| PPX2/INV_F<br>PPX2/INV_R   | TAATAAG <b>GAT</b> CCAGTATTTG AACCAAGATC TA<br>AATTAAG <b>GAT</b> CCACCTTTCGT AAGTTTAAAT GT | Used for <i>ppx2/gppa</i> gene deletion by inverse PCR                                   |
| PPX2C_F<br>PPX2C_R         | ATG <b>CGGTACC</b> CTTGCTTTAA TGGATTTTGG<br>ATAAAG <b>GATC</b> CCCGTGTTTA GCTGCTATAA A      | Used for <i>ppx2/gppa</i> gene amplification for complementation                         |
| SpoT F<br>SpoT R           | GTAACCACTC GCACAATATC<br>GATGTCGCAG TTTATTCTCC                                              | Used for qRT-PCR                                                                         |
| PPK1 F<br>PPK1 R           | TGAAGCAAGT ATGGAAGGAG<br>ATATAGGAGT CATAAGTTCT AAGC                                         | Used for qRT-PCR                                                                         |
| PPK2 F<br>PPK2 R           | ATCTAATACT CCAACTTGTC<br>TTCTTCTTCT CCACTACG                                                | Used for qRT-PCR                                                                         |
| LgtF F<br>LgtF R           | ACCTCAGTGC AAGGGAAGAA GGAA<br>TCTCATGCTC GGTACCATCA GCTT                                    | Used for qRT-PCR                                                                         |
| CstII_F<br>CstII_R         | AGCTCACATC CTCGTATTCC ACCA<br>AGAAGCGTCG GGTCTTCTCG CT                                      | Used for qRT-PCR                                                                         |
| KpsM_F<br>KpsM_R           | CCCTAAAGCA AAAGCTGAGC<br>TTAGCCTATA AACCTGTAAA ACCTATA                                      | Used for qRT-PCR                                                                         |
| WaaF_F<br>WaaF_R           | ATCACAATG ACAGTGGACC T<br>GCCAAGGTGA AGTTTGAGTA AAT                                         | Used for qRT-PCR                                                                         |
| 16s RNA_F<br>16s RNA_R     | GTCTCTTG TG AAATCTAATG<br>GTATTCTTGG TGATATCTAC                                             | Used as qRT-PCR internal control                                                         |

Bold sequence indicate the restriction enzymes site.
